# Supplementary material for: Auto/paracrine factors and early Wnt inhibition promote cardiomyocyte differentiation from human induced pluripotent stem cells at initial low cell density
Source: PubMed Central journal article supplement (PMC8563935; doi:10.1038/s41598-021-00763-z), 2021-11-02
Supplement: 41598_2021_763_MOESM1_ESM.pdf [file 41598_2021_763_MOESM1_ESM.pdf]

1 Supplementary information

2  
3 Auto/paracrine factors and early Wnt inhibition promote  
4 cardiomyocyte differentiation from human induced pluripotent  
5 stem cells at initial low cell density

6  
7 Minh Nguyen Tuyet Le <sup>1,\*</sup>, Mika Takahi <sup>2,\*</sup>, Kiyoshi Ohnuma <sup>1,2,\*\*</sup>

8 <sup>1</sup> Department of Bioengineering, Nagaoka University of Technology, 1603-1 Kamitomioka,  
9 Nagaoka, Niigata 940-2188, Japan

10 <sup>2</sup> Department of Science of Technology Innovation, Nagaoka University of Technology, 1603-1  
11 Kamitomioka, Nagaoka, Niigata 940-2188, Japan

12  
13 \* These authors contributed equally to this work

14 \*\* Correspondence should be addressed to Kiyoshi Ohnuma

15 e-mail: kohnuma@vos.nagaokaut.ac.jp, Tel/Fax: +81-258-47-9454

19 In supplementary figures S6 and S7, the human induced pluripotent stem cell (hiPSC) line  
20 KOSM4 [1, 2] was used. In supplementary figures S1-5 and S8, another human induced  
21 pluripotent stem cell (hiPSC) line, 201B7 [3] was used to support the main results.

22

### 23 ***Cell culture of 201B7***

24 201B7 was obtained from the RIKEN BRC Cell Bank (HPS0063, Tsukuba, Ibaraki, Japan)  
25 through the National Bio-Resource Project for the Ministry of Education, Culture, Sports, Science,  
26 and Technology, Japan. The cells were plated in serum-free medium (StemFit AK02 N,  
27 Ajinomoto, according to the protocol supplied by the manufacturer of the medium) with Y-27632  
28 (Rock inhibitor, final concentration was 5  $\mu$ M, 036-24023, Wako) and 0.25  $\mu$ g/cm<sup>2</sup> laminin  
29 (iMatrix-511, 387-10131, Wako) [4]. On the following day, the medium was changed to StemFit  
30 AK02 N medium without Y-27632 and the medium was then changed daily. When the cells  
31 reached 80% confluence, they were passaged using TrypLE Select (1 $\times$ ) or TrypLE express.

32 The methods and reagent for cardiac cell induction were the same as those described in the main  
33 text. In Fig. S8, we used IWR1 (I0161-5MG, Merck), a tankyrase inhibitor to inhibit the Wnt/ $\beta$ -  
34 catenin signaling pathway.

35

### 36 ***PCR and immunostaining***

37 PCR and immunostaining methods were also the same as those mentioned in the main text.

38

### 39 ***Measurement of protein secretion by ELISA***

40 The cells were seeded at a high density of  $2 \times 10^5$  cells/cm<sup>2</sup> in the 24-well (DKK1) or 12-well  
41 (DKK4, CER1) plate one day prior to inducing cardiomyocyte differentiation. The supernatant  
42 was collected and the number of cells were counted immediately before induction (day 0) and at  
43 1, 3 and 5 days after cardiomyocyte differentiation. DKK1 concentration was measured using  
44 Human DKK-1 Quantikine ELISA Kit (DKK100B, R&D Systems), Human Cerberus 1 ELISA  
45 Kit, (ELH-CER1, Ray biotech) and Human Dkk-4 ELISA Kit (ELH-DKK4, Ray biotech)

46 according to the protocol supplied by the manufacturers. Briefly, for DKK1, the mixture of assay  
47 diluent and sample were incubated for 2 hours at room temperature on a shaker. After each well  
48 was rinsed by the wash buffer four times, human Dkk-1 Conjugate was added to each well and  
49 the plate was incubated for 2 hours at room temperature on the shaker. After reaction, all wells  
50 were rinsed four times and then substrate solution was added to each well and incubated for 30  
51 minutes at room temperature on the benchtop without light. Finally, stop solution was added to  
52 each well and determine the optical density of each well using a microplate reader (680, BIO-  
53 RAD) set to 450 nm, and the wavelength correction was applied at 540 nm.

54 For DKK4 and CER1, assay diluent was added to each well. After that, samples were added and  
55 incubated for 2.5 hours at room temperature on a shaker. Next, each well was rinsed with the  
56 wash buffer four times. Then, biotinylated antibody was added to each well and the plate was  
57 incubated for 1 hours at room temperature on the shaker. After the reaction, each well was rinsed  
58 four times, streptavidin solution was added to each well and the plate was incubated for 45  
59 minutes at room temperature. After reaction, each well was rinsed four times, TMB one-step  
60 substrate reagent was added to each well and the plate was incubated for 30 minutes at room  
61 temperature on the benchtop shielded from light. Finally, stop solution was added to each well  
62 and the optical density of each well was determined using a microplate reader set to 450 nm.

63

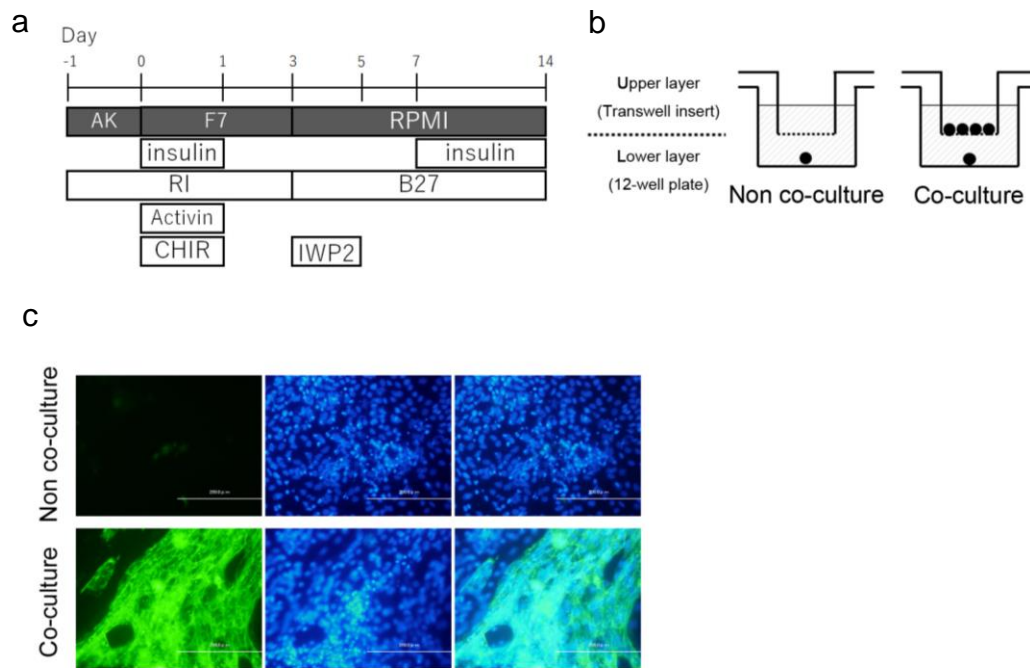

64 Fig. S1 Co-culture with high-density cells promoted cardiac differentiation in low-density  
 65 culture for 201B7 cells.  
 66

67 (a) Schematic of cardiac differentiation at an initial low cell density ( $5 \times 10^3$  cells/cm<sup>2</sup>).

68 (b) Schematic of co-culture experiments.

69 (c) Immunostaining of cardiac-differentiated cells at an initial low using cTnT on day 14. DAPI (blue)

70 was used for positive control. Scale bar = 200  $\mu$ m.

71

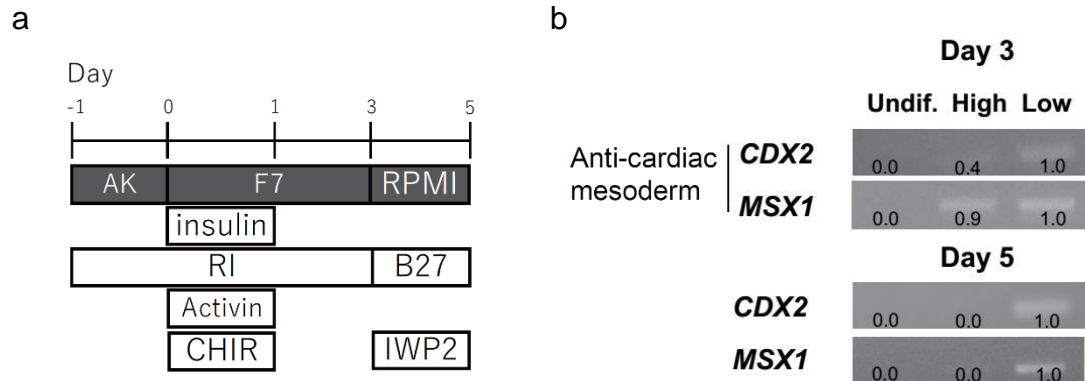

72  
 73 Fig. S2 Expression of anti-cardiac mesoderm genes, *CDX2* and *MSX1*, at an initial low  
 74 and high cell density in 201B7 cells  
 75 (a) Schematic of cardiac differentiation at an initial high (High:  $2 \times 10^5$  cells/cm<sup>2</sup>) and low (Low:  
 76  $5 \times 10^3$  cells/cm<sup>2</sup>) cell density, with addition of the Wnt production inhibitor, IWP2 from day 3-  
 77 5. Differentiation was co-induced by 10 ng/mL activin A and 6  $\mu$ M CHIR99201.  
 78 (b) Expression of anti-cardiac mesoderm genes *CDX2* and *MSX1* on days 3 and 5 by RT-PCR.  
 79 For semi-quantification, gene expression of low density cell was set as 1.0.

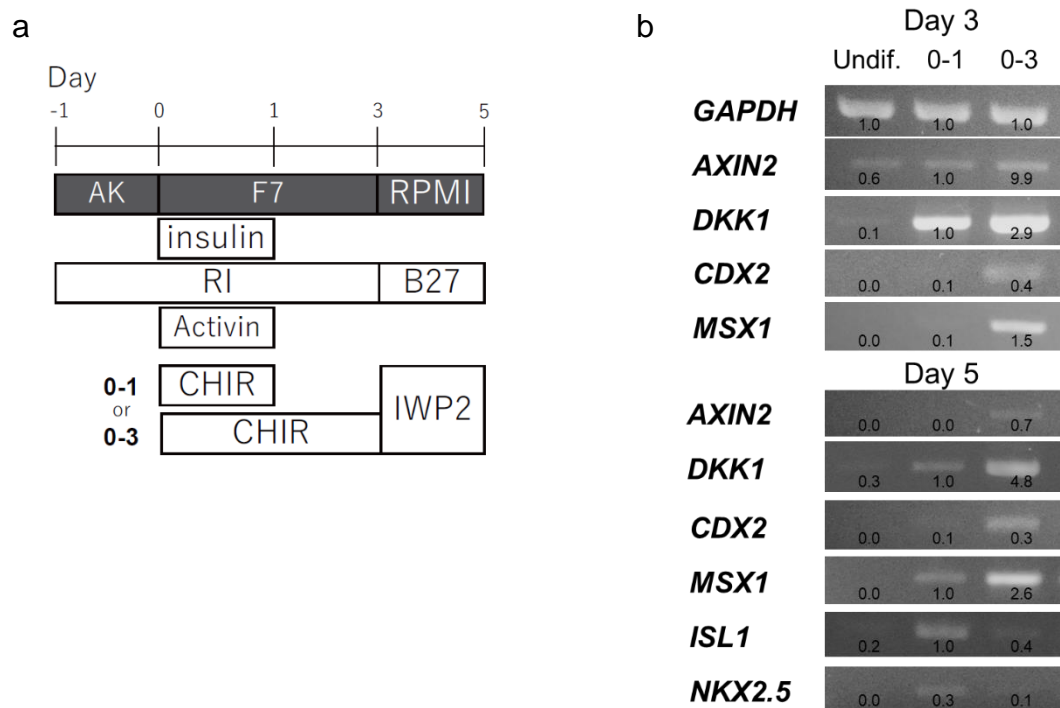

80

81 Fig. S3 Gene expression by long-term CHIR addition in 201B7 cells

82 (a) Schematic of cardiac differentiation at an initial high cell density ( $2 \times 10^5$  cells/cm<sup>2</sup>) on day -

83 1. The Wnt activator, CHIR99201 (final concentration: 6  $\mu$ M), was applied from day to 0-1 or

84 day 0-3 and the Wnt production inhibitor, IWP2 (final concentration: 5  $\mu$ M), was applied from

85 day 3 to day 5. Differentiation was co-induced by 10 ng/mL activin A.

86 (b) Expression of Wnt/ $\beta$ -catenin signaling (*AXIN2* and *DKK1*), anti-cardiac (*CDX2* and *MSX1*)

87 and cardiac progenitor genes (*ISL1* and *NKX2.5*) on days 3 and 5 by RT-PCR.

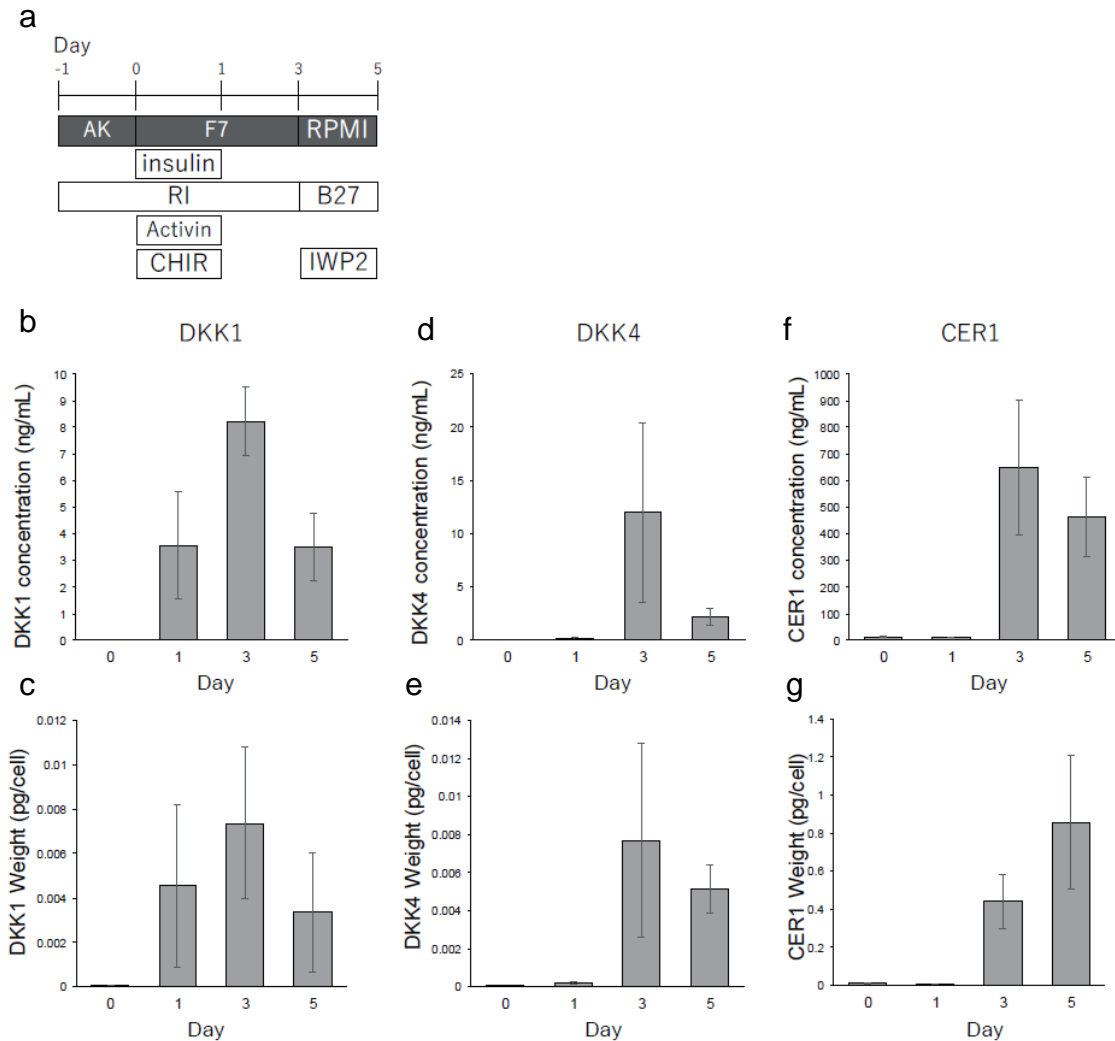

88

89 Fig. S4. High-density cells secrete the Wnt inhibitor DKK1, DKK4 and CER1, which peak 3 days  
 90 after the induction of cardiomyocyte differentiation in 201B7 cells.

91 (a) Schematic of cardiac differentiation at an initial high cell density ( $2 \times 10^5$  cells/cm<sup>2</sup>).  
 92 Differentiation was co-induced by 10 ng/mL activin A and 6  $\mu$ M CHIR99201.

93 (b-g) The graph shows the amount of DKK1, DKK4 and CER1 secreted from one cell or the total  
 94 concentration of these Wnt inhibitors during cardiac differentiation at a high cell density. Mean  
 95  $\pm$  SE, \*  $P < 0.05$ , Dunnett's multiple comparison, n=4.

96

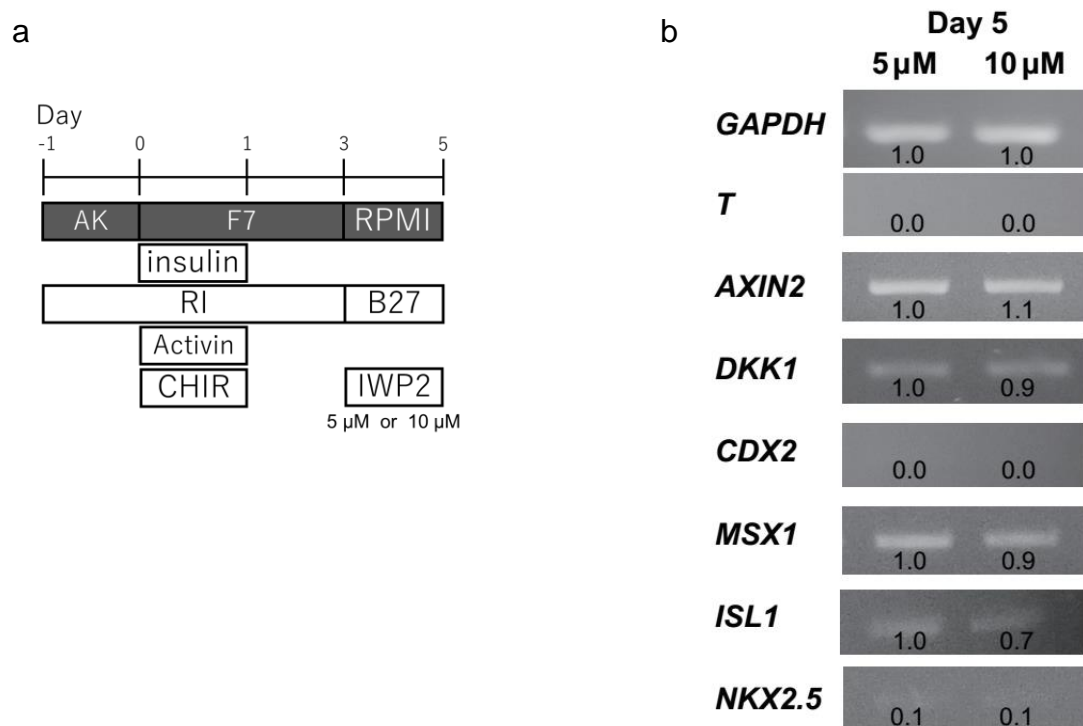

97 Fig. S5. Doubled concentration of IWP2 did not affect gene expression during cardiac  
 98 differentiation at an initial low cell density condition in 201B7 cells

99 (a) Schematic of cardiac differentiation at an initial low cell density ( $5 \times 10^3$  cells/cm<sup>2</sup>) on day -  
 100 1. The Wnt production inhibitor, IWP2 (final concentration: 5 μM or 10 μM), was applied from  
 101 day 3 to day 5. Differentiation was co-induced by 10 ng/mL activin A and 6 μM CHIR99201.

102 (b) Expression of mesoderm (*T*), Wnt/β-catenin signaling (*AXIN2* and *DKK1*), anti-cardiac  
 103 (*CDX2* and *MSX1*), and cardiac progenitor (*ISL1* and *NKX2.5*) on day 5 by RT-PCR.

104

105



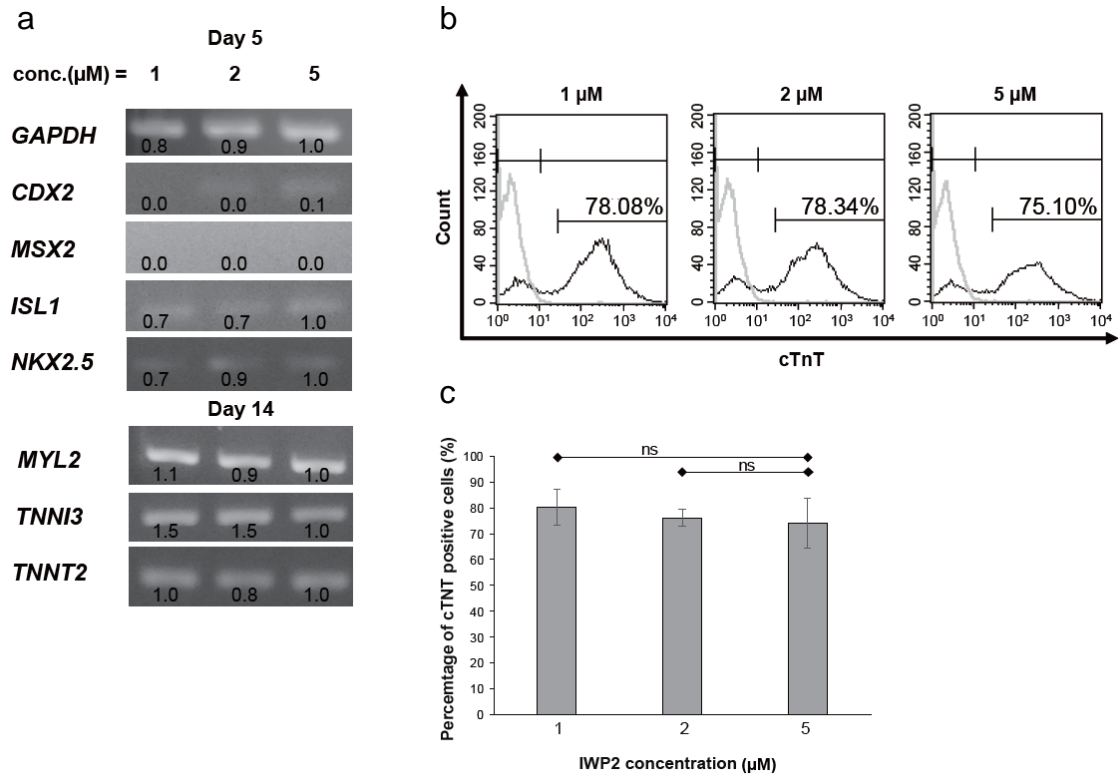

106

107 Fig. S6. Even low concentrations of IWP2 induced cardiac differentiation with high efficiency at  
 108 a low initial cell density in KOSM4 cells

109 (a) Expression of anti-cardiac mesoderm genes *CDX2* and *MSX1* and cardiac progenitor genes  
 110 *ISL1* and *NKX2.5* on day 5. The expression levels of cardiomyocyte genes (*MYL2*, *TNNI3*, and  
 111 *TNNT2*) on day 14. IWP2 was added during day 1–3.

112 (b) Flow cytometry of cTnT-positive cells induced by IWP2 treatment at each indicated  
 113 concentration during day 1–3.

114 (c) The percentage of cTnT-positive cells under the same conditions as (b). Mean  $\pm$  SE, \*\*  $P <$   
 115 0.01, *t*-tests with Dunnett's correction.

116

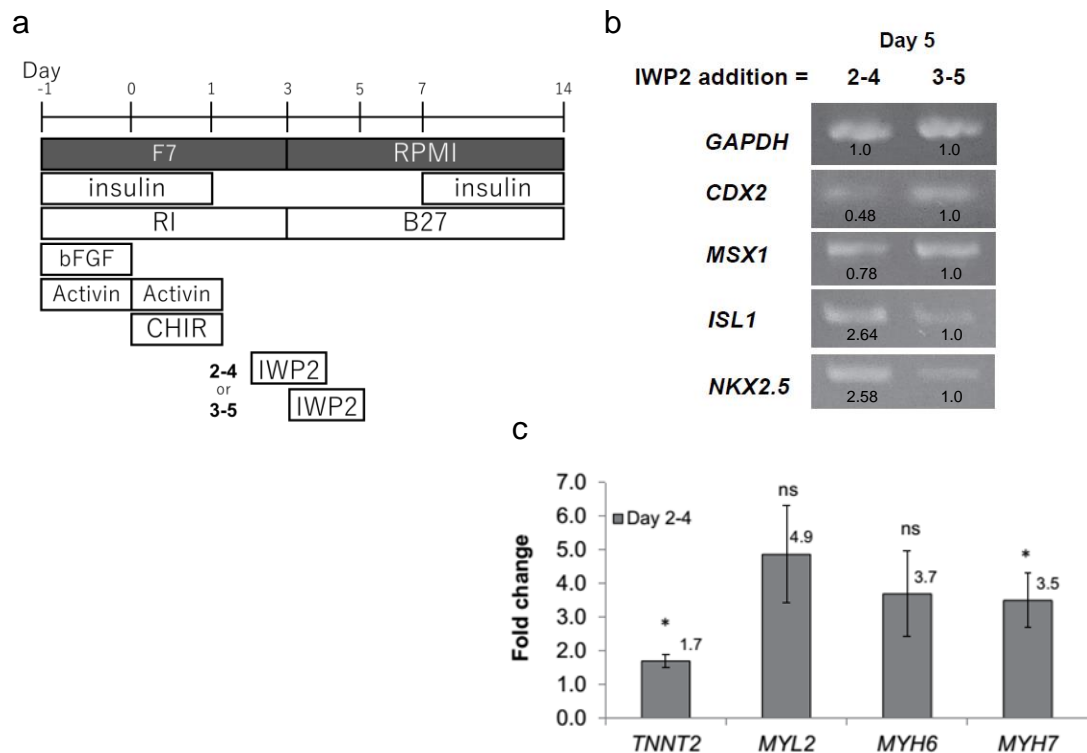

117 Fig. S7. Early addition of Wnt inhibitor during day 2–4 was sufficient to improve the  
 118 cardiomyocyte differentiation efficiency at a low initial cell density in KOSM4 cells  
 119 (a) Schematic of cardiac differentiation at an initial low cell density ( $5 \times 10^3$  cells/cm<sup>2</sup>) on day -  
 120 1. The Wnt production inhibitor IWP2 (final concentration: 5  $\mu$ M), was applied from day 3 to 5  
 121 or day 2 to 4. Differentiation was co-induced by 10 ng/mL activin A and 3  $\mu$ M CHIR99201. IWP2  
 122 was added on days 3–5 or earlier on days 2–4 at a concentration of 5  $\mu$ M.  
 123 (b) Expression of anti-cardiac mesoderm genes *CDX2* and *MSX1* was examined along with that  
 124 of cardiac progenitor markers *ISL1* and *NKX2.5* on day 5 by RT-PCR.  
 125 (c) Expression of cardiac terminal genes, including cardiac troponin T (*TNNT2*), myosin light  
 126 chain (*MYL2*), and myosin heavy chain alpha and beta (*MYH6* and *MYH7*) on day 14 by RT-  
 127 qPCR. Data represent mean  $\pm$  SE, n = 3, \* P < 0.05, *t*-tests with Holm’s correction, ns: non-  
 128 significance.  
 129

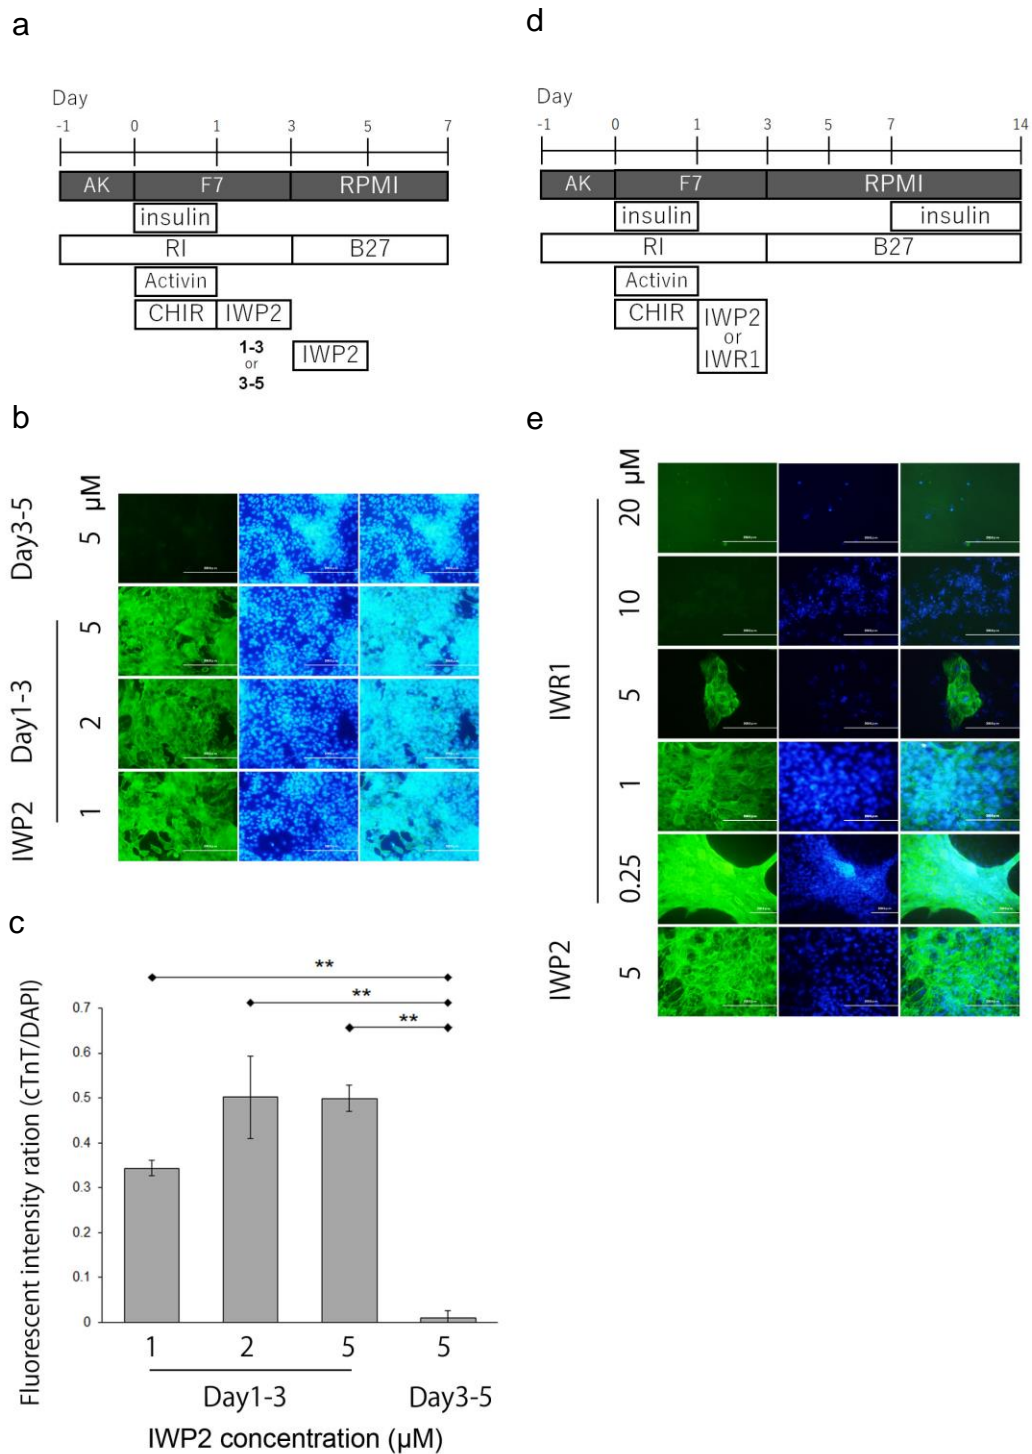

130 Fig. S8. Early addition of the Wnt/ $\beta$ -catenin signaling inhibitor induces cardiac  
 131 differentiation at an initial low cell density for 201B7 cells  
 132  
 133 (a) Schematic of cardiac differentiation at an initial low cell density ( $5 \times 10^3$  cells/cm<sup>2</sup>) on day -

134 1, with the Wnt production inhibitor IWP2 added from days 1–3 (final concentration: 1, 2 and 5  
135  $\mu\text{M}$ ) or days 3–5 (final concentration: 5  $\mu\text{M}$ ).

136 (b) Early addition of IWP2 induced cardiac differentiation even at low concentrations at a low  
137 initial cell density in 201B7 cells. Cells were fixed on day 7 for immunostaining using cTnT  
138 (green) and DAPI (blue). Scale bar = 200  $\mu\text{m}$ .

139 (c) Quantification of cTnT-positive cells under the same conditions as in (b) using Image J. Mean  
140  $\pm$  SE, \*\*  $P < 0.01$ , t-tests with Dunnett's correction,  $n = 3$ .

141 (d) Schematic of cardiac differentiation at an initial low cell density ( $5 \times 10^3$  cells/cm<sup>2</sup>) on day -  
142 1, with the Wnt production inhibitor, IWP2 (final concentration: 5  $\mu\text{M}$ ), or the Wnt/ $\beta$ -catenin  
143 signaling inhibitor, IWR1 (Final concentration: 0.25–20  $\mu\text{M}$ ) from days 1–3.

144 (e) The Wnt/ $\beta$ -catenin signaling inhibitor IWR1 was added during the early stages of days 1–3 at  
145 different concentrations. Cells were fixed on day 14 for immunostaining using the cardiac  
146 differentiation marker cTnT (green) and DAPI (blue). Scale bar = 200  $\mu\text{m}$ .

147

a Day 2

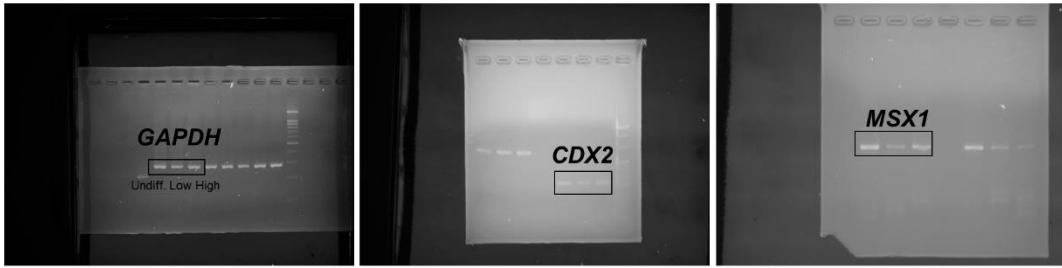

Day 5

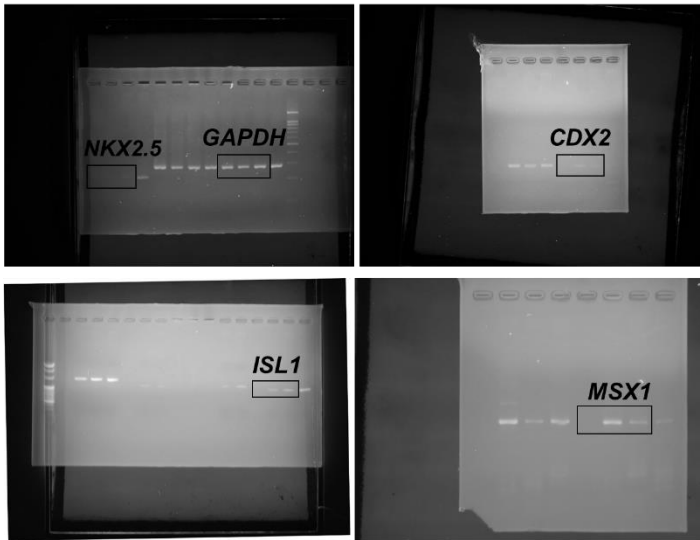

148

149

b

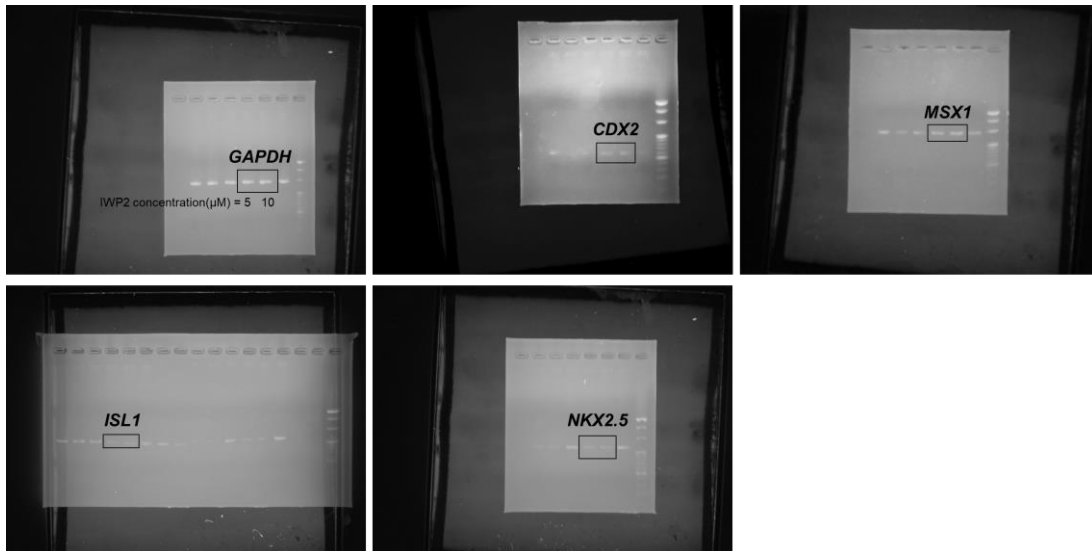

150

151

C Day 5

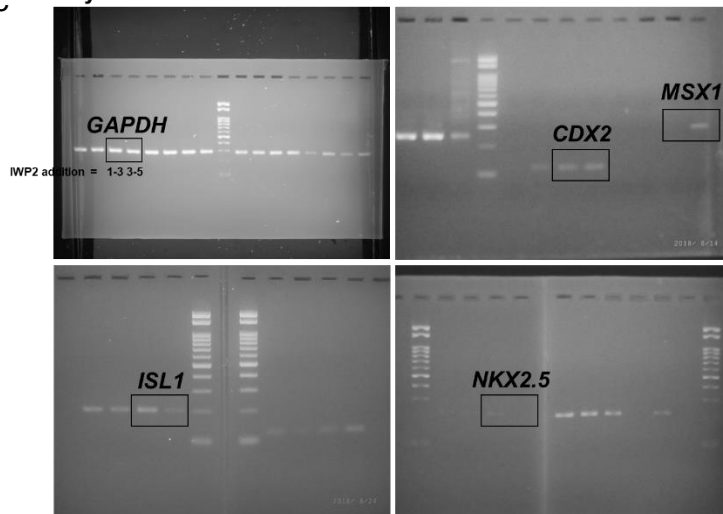

Day 14

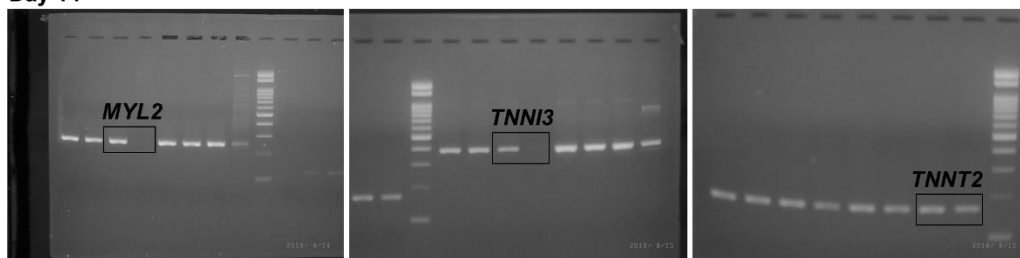

152

d Day 3

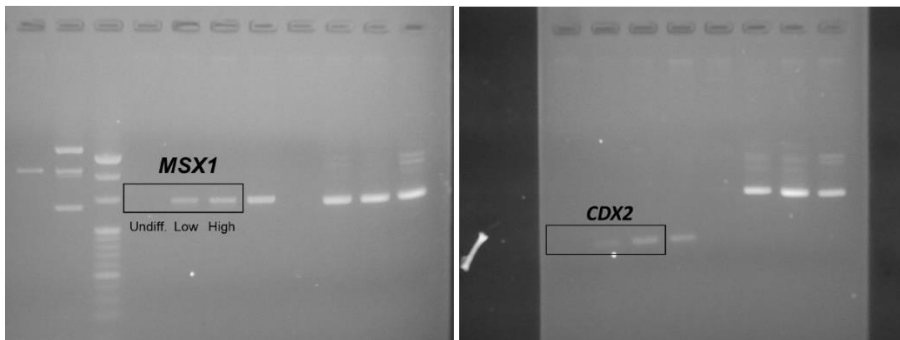

Day 5

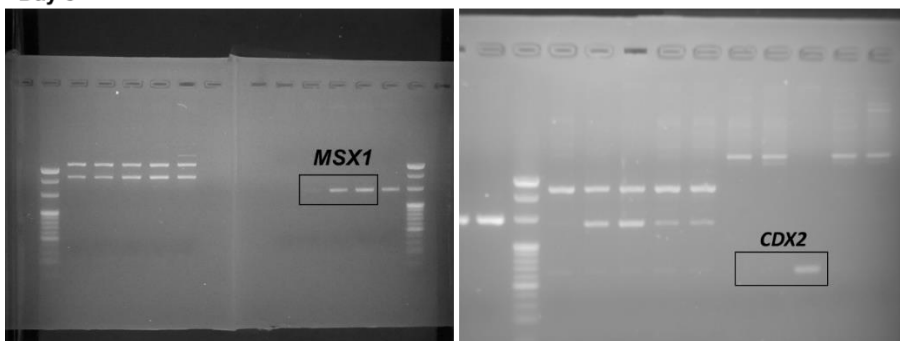

153

154

e

Day 3

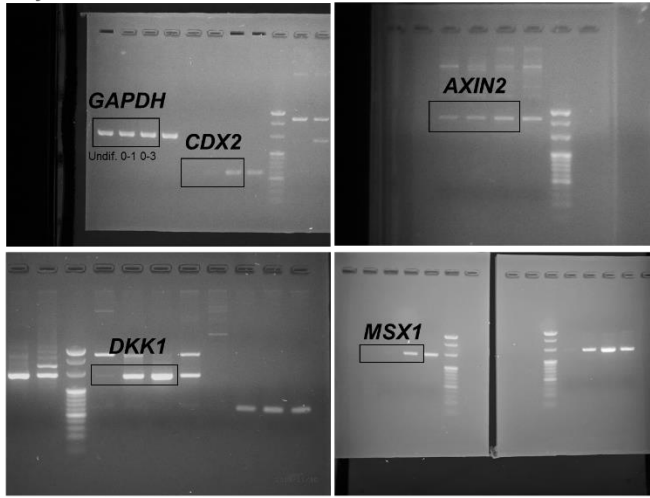

Day 5

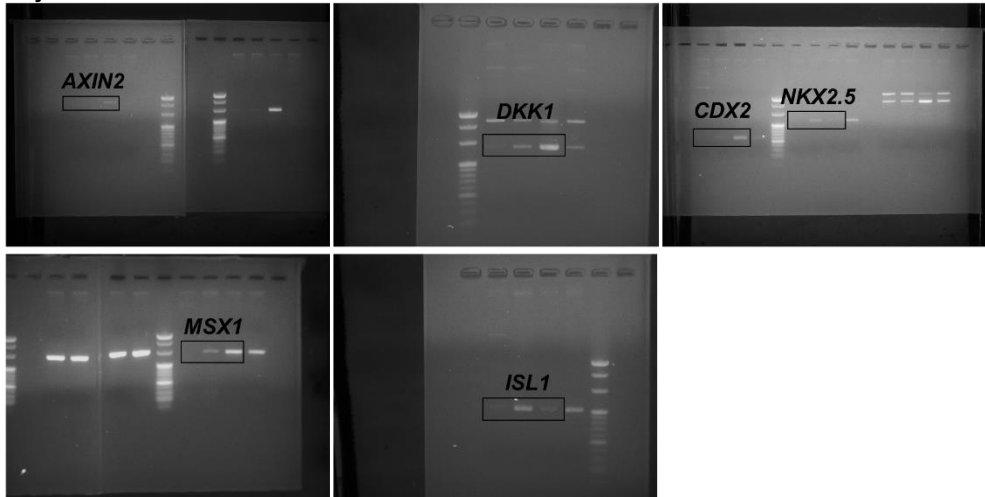

155

156

f

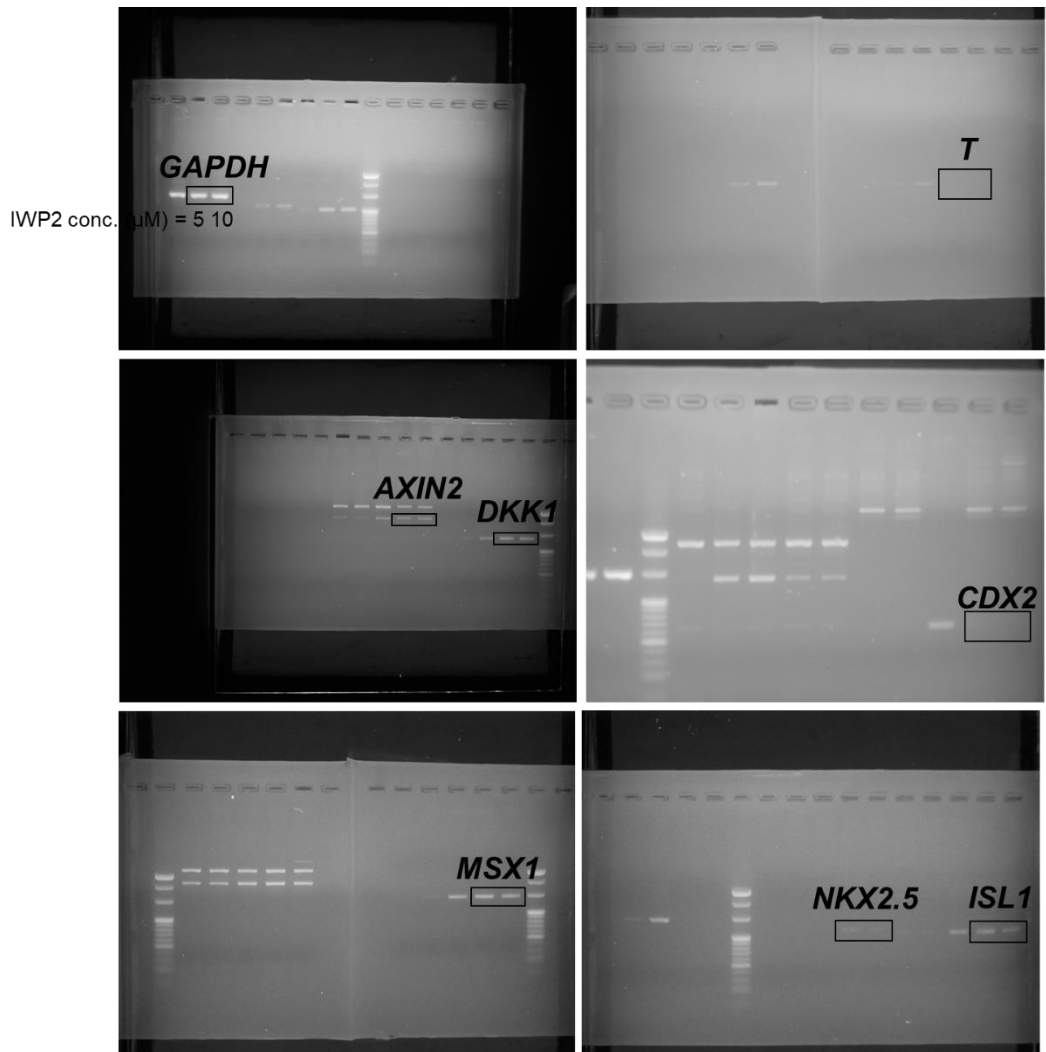

157

158



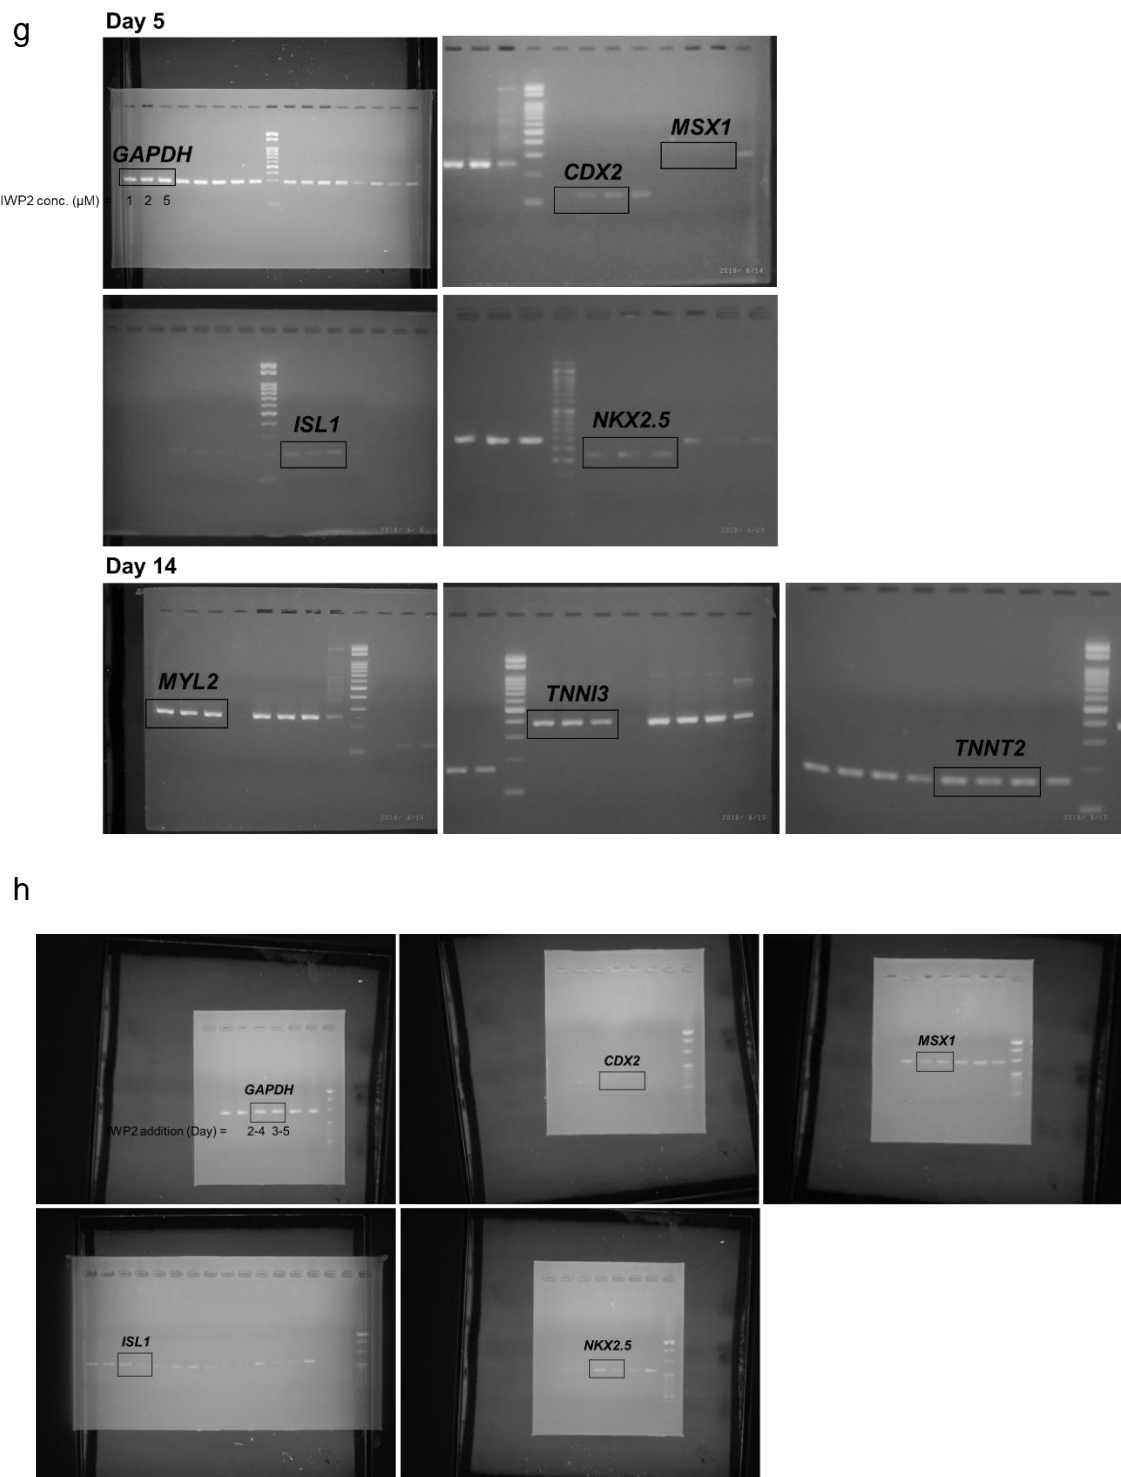

162 Fig. S9. Full-length gels of electrophoresis

163 (a) Figure 2.

164 (b) Figure 3.

165 (c) Figure 4.

166 (d) Figure S2.

167 (e) Figure S3.

168 (f) Figure S5.

169 (g) Figure S6.

170 (h) Figure S7.

171 Table S1. F7 medium components

| Reagent                     | Final concentration                   | Manufacturer  |
|-----------------------------|---------------------------------------|---------------|
| mESF basal medium           |                                       | Wako          |
| Transferrin                 | 5 $\mu\text{g/mL}$                    | Sigma-Aldrich |
| Ethanolamine                | 10 $\mu\text{M}$                      | Sigma-Aldrich |
| Sodium selenite             | 20 nM                                 | Sigma-Aldrich |
| 2-mercaptoethanol           | 10 $\mu\text{M}$                      | Sigma-Aldrich |
| L-ascorbic acid-2-phosphate | 100 ng/mL                             | Wako          |
| Oleic acid (OA)-BSA         | OA 9.4 $\mu\text{g/mL}$ , BSA 1 mg/mL | Sigma-Aldrich |
| Heparin                     | 0.1 $\mu\text{g/mL}$                  | Sigma-Aldrich |

172

173 Table S2. Primer information

| Marker                           |   | Sequence (5'→3')           | Size (bp) | PCR method <sup>a,b,c</sup> | Cycle number |
|----------------------------------|---|----------------------------|-----------|-----------------------------|--------------|
| <i>GAPDH</i><br>Internal control | F | TGACCTGCCGTCTAGAAAAACC     | 288       | 3-step –<br>58°C            | 30           |
|                                  | R | TGGTCCAGGGGTCTTACTCCTT     |           |                             |              |
| <i>ISL1</i>                      | F | CACAAGCGTCTCGGGATT         | 202       | 3-step –<br>58°C            | 30           |
|                                  | R | AGTGGCAAGTCTTCCGACA        |           |                             |              |
| <i>NKX2.5</i>                    | F | GCGATTATGCAGCGTGCAATGAGT   | 220       | 3-step –<br>70°C            | 30           |
|                                  | R | AACATAAATACGGGTGGGTGCGTG   |           |                             |              |
| <i>TNNI3</i>                     | F | CTGCAGATTGCAAAGCAAGA       | 379       | 3-step –<br>58°C            | 40           |
|                                  | R | CCTCCTTCTTCACCTGCTTG       |           |                             |              |
| <i>TNNT2</i>                     | F | TTCACCAAAGATCTGCTCCTCGCT   | 165       | 3-step –<br>58°C            | 40           |
|                                  | R | TTATTACTGGTGTGGAGTGGGTGTGG |           |                             |              |
| <i>MYL2</i>                      | F | ACATCATCACCCACGGAGAAGAGA   | 247       | 3-step –<br>58°C            | 40           |
|                                  | R | ATTGGAACATGGCCTCTGGATGGA   |           |                             |              |
| <i>CDX2</i>                      | F | GCCAACCTGGACTTCTGTCA       | 119       | 3-step –<br>58°C            | 30           |
|                                  | R | TCTGGCTTGGATGTTACACAGACC   |           |                             |              |
| <i>MSX1</i>                      | F | CCGAGAGGACCCCGTGGATGC      | 280       | 2-step                      | 40           |
|                                  | R | GCCTCTTGTAAGTCTCTTTGCC     |           |                             |              |
| <i>DKK1</i>                      | F | GTGCAAATCTGTCTCGCCTG       | 266       | 3-step –<br>70°C            | 30           |
|                                  | R | GCACAGTCTGATGACCGGAG       |           |                             |              |
| <i>AXIN2</i>                     | F | GGCTGCGCTTTGATAAAGGTC      | 418       | 2-step                      | 35           |
|                                  | R | GCCTGGTGTGGAAGAGACA        |           |                             |              |

174

175 Specific temperatures of 2-step and 3-step conditions:

176 **PCR condition**177 <sup>a</sup> 2-step cycle: 94°C for 30 s, 68°C for 30 s, 72°C for 5 min, 4 °C178 <sup>b</sup> 3-step cycle (58°C): 94°C for 30 s, 58°C for 30 s, 72°C for 40 s, 72°C for 5 min, 4°C179 <sup>c</sup> 3-step cycle (70°C): 94°C for 30 s, 70°C for 30 s, 72°C for 40 s, 72°C for 5 min, 4°C

180

181 Table S3. Antibody information

| Markers   | Primary antibody                                                                                               | Secondary antibody                                                                                             |
|-----------|----------------------------------------------------------------------------------------------------------------|----------------------------------------------------------------------------------------------------------------|
| BRACHYURY | Anti-BRACHYURY,<br>goat polyclonal IgG,<br>AF2085, Santa Cruz <sup>a</sup> ,<br>Dilution 1:20 (glycerol stock) | Donkey anti-goat IgG<br>Alexa Fluor 546, A21222,<br>Life Technologies <sup>b</sup> ,<br>Dilution 1:500         |
| CDX2      | Anti-CDX2, rabbit monoclonal IgG,<br>Sab76541, Abcam <sup>c</sup> ,<br>Dilution 1:250 (glycerol stock)         | Goat anti-rabbit IgG (H+I)<br>Alexa Fluor 488, A11034,<br>Life Technologies <sup>b</sup> ,<br>Dilution 1:500   |
| cTnT      | Anti-Cardiac Troponin T, Mouse<br>Monoclonal IgG1,<br>MA5-12960, Thermo Fisher <sup>d</sup><br>Dilution 1:150  | Goat anti-mouse IgG1( $\gamma$ 1),<br>Alexa Fluor 488, A21121,<br>Thermo Fisher <sup>d</sup><br>Dilution 1:500 |

182 <sup>a</sup> Santa Cruz Biology, Inc., Santa Cruz, CA, USA183 <sup>b</sup> Life Technologies, Carlsbad, CA, USA184 <sup>c</sup> Abcam, Milton Road, Cambridge, UK185 <sup>d</sup> Thermo Fisher Scientific K.K., Tokyo, Japan

186

187 References

- 188 1. Le, M.N.T., et al., *Cardiac differentiation at an initial low density of human-induced pluripotent*  
189 *stem cells*. In *Vitro Cell Dev Biol Anim*, 2018. **54**(7): p. 513-522.
- 190 2. Nishimura, K., et al., *Development of defective and persistent Sendai virus vector: a unique gene*  
191 *delivery/expression system ideal for cell reprogramming*. *J Biol Chem*, 2011. **286**(6): p. 4760-71.
- 192 3. Takahashi, K., et al., *Induction of pluripotent stem cells from adult human fibroblasts by defined*  
193 *factors*. *cell*, 2007. **131**(5): p. 861-872.
- 194 4. Miyazaki, T., et al., *Efficient Adhesion Culture of Human Pluripotent Stem Cells Using Laminin*  
195 *Fragments in an Uncoated Manner*. *Sci Rep*, 2017. **7**: p. 41165.
- 196
